# Supplementary material for: Self-healable, super Li-ion conductive, and flexible quasi-solid electrolyte for long-term safe lithium sulfur batteries
Source: Royal Society of Chemistry journal article supplement (doi:10.1039/d2ta09310c), 2023-01-01
Supplement: d2ta09310c1.pdf [file d2ta09310c1.pdf]

## Supporting Information

### **Self-healable, super Li-ion conductive, and flexible quasi-solid electrolyte for long-term safe lithium sulfur battery**

*Anh Le Mong, and Dukjoon Kim\**

A.L. Mong, Prof. D. Kim

School of Chemical Engineering, Sungkyunkwan University, Gyeonggi, Suwon, 16419,

Republic of Korea.

E-mail: [djkim@skku.edu](mailto:djkim@skku.edu)

Number of page: 23

Number of figure: 16

## Experimental procedure

*Preparation of ionic liquid (IL):* PYR–TFSI was prepared from PYR and IB, as described in **Fig. S1A**. A solution of IB (19 g)/ THF (10 mL) was slowly dropped in a reactor containing PYR (10 g) and acetylacetate (25 mL). The reactor was heated at 50 °C for 6 h to obtain white solids. The filtered solids were washed three-times with acetylacetate, and dried under vacuum at room temperature for 24 h to produce PYR–I solids. The PYR–TFSI IL was obtained via ionic exchange from PYR–I (9.5 g), LiTFSI (10 g), and deionized water (9 g). The phase separation appears from an initial mixture after 6 h. The bottom phase was filtered and washed with cold water to remove excess salts. PYR–TFSI IL was obtained after freeze drying for 48 h.

## Results and Discussion

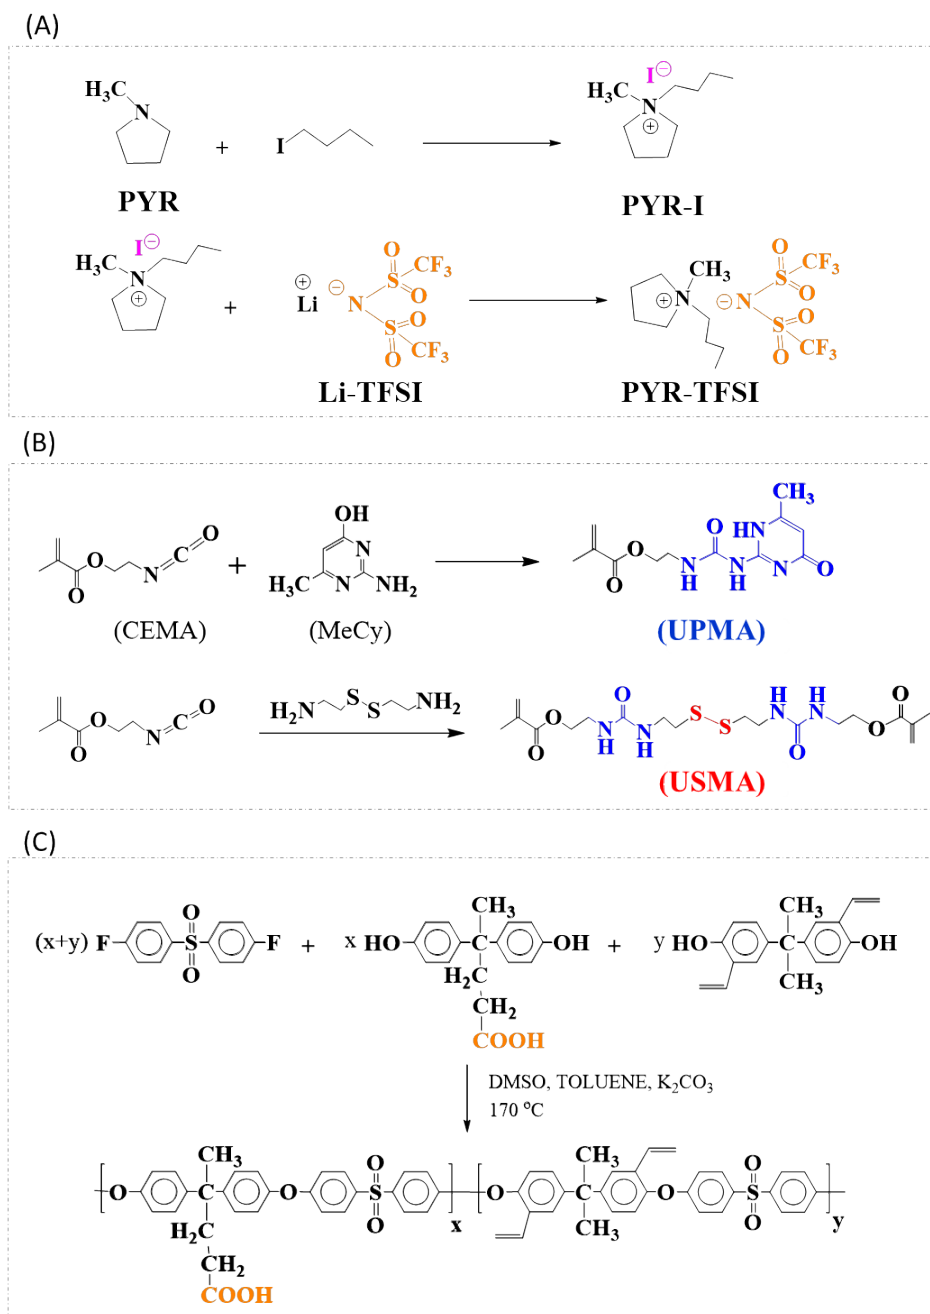

**Figure S1.** Synthetic scheme of (A) ionic liquid; (B) self-healing monomer (UPMA and SSMA); and (C) PAES backbone.

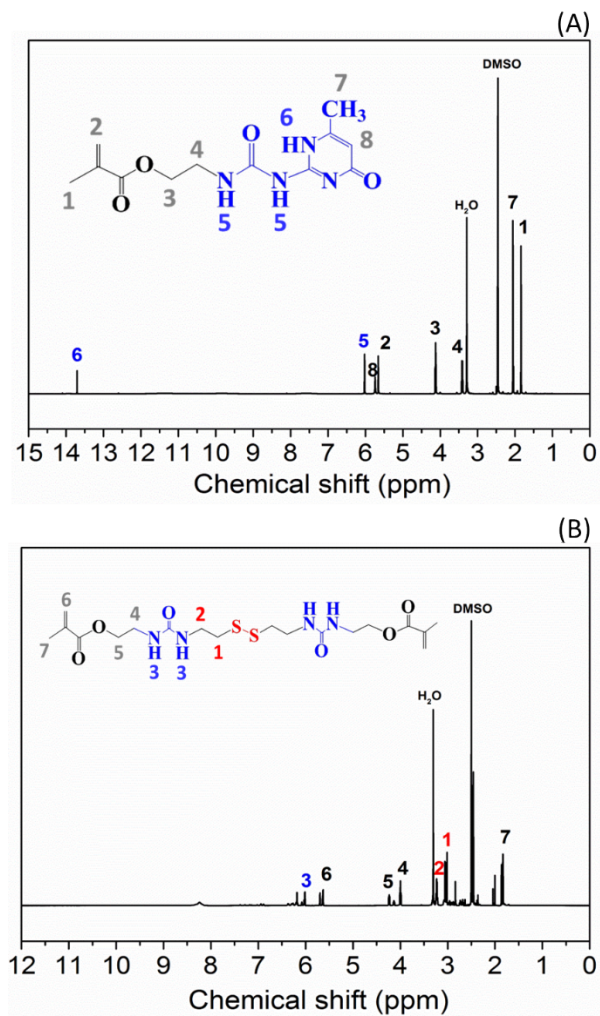

**Figure S2.** NMR spectra of (A) UPMA and (B) USMA monomers.

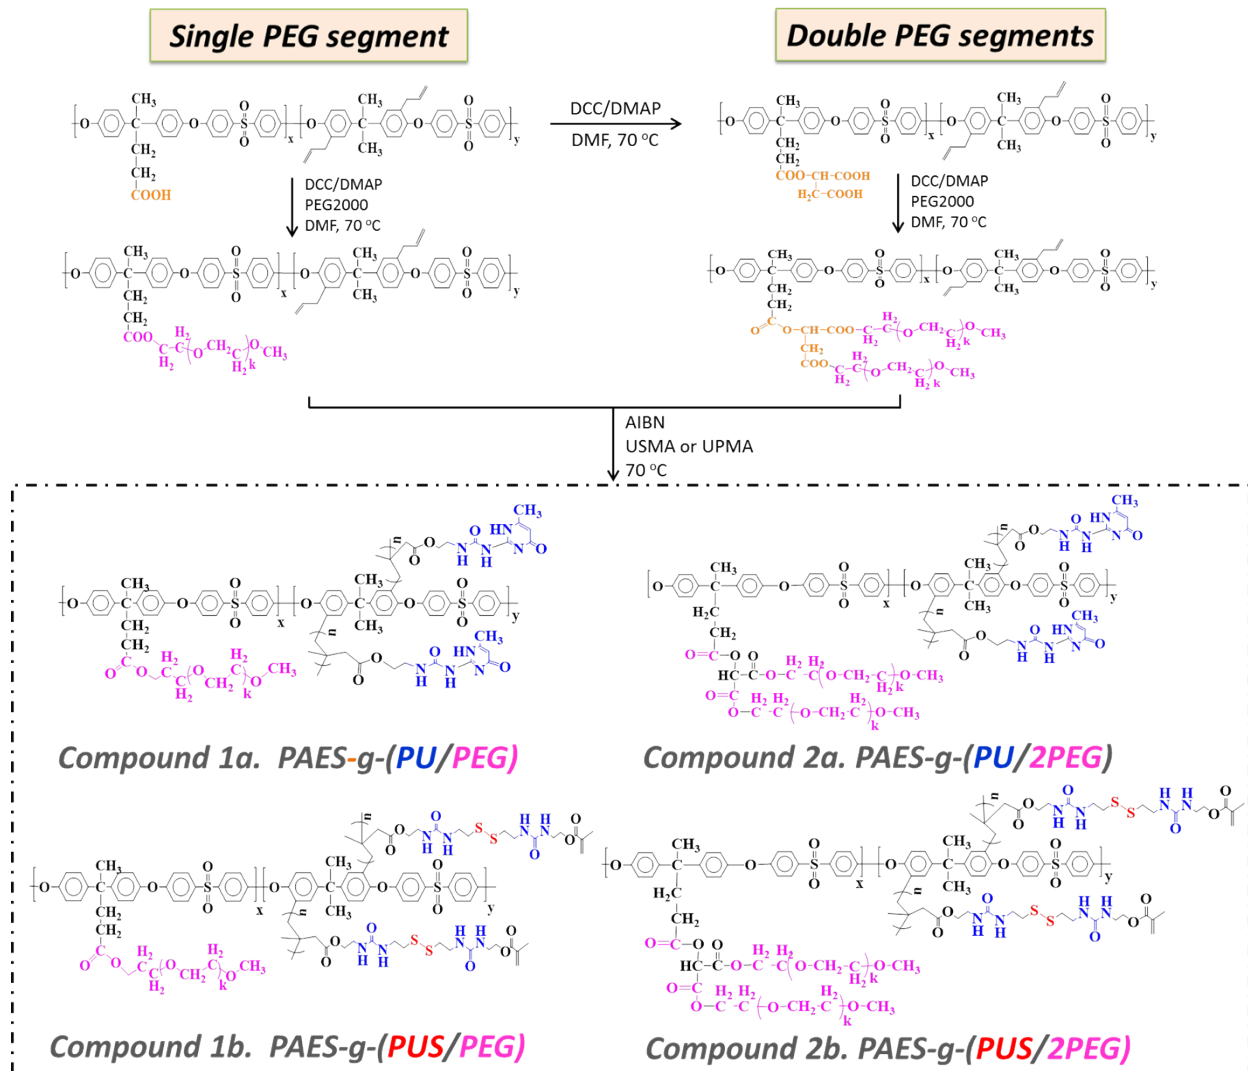

**Figure S3.** Synthetic scheme of PAES-g-(PU/PEG), PAES-g-(PU/2PEG), PAES-g-(PUS/PEG), and PAES-g-(PUS/2PEG).

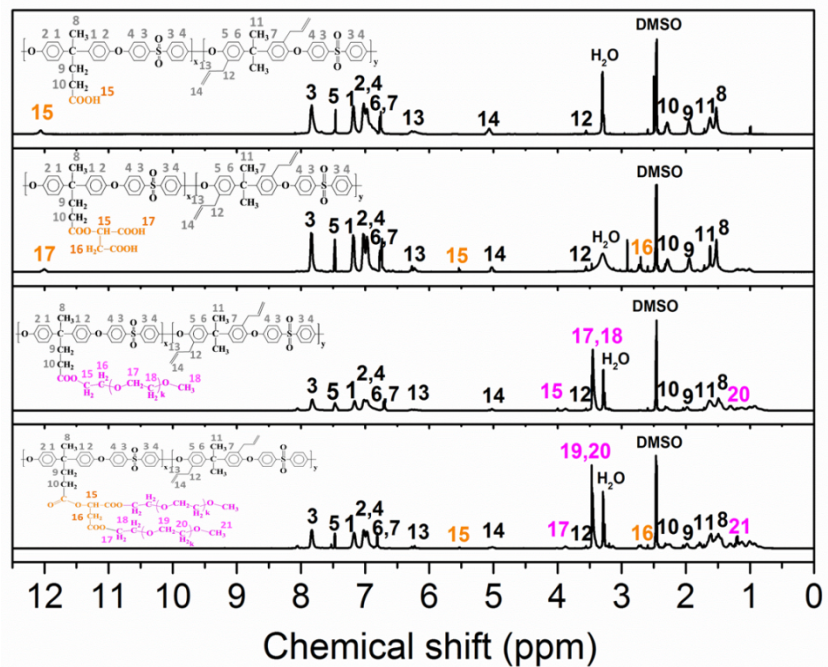

**Figure S4.** NMR spectra of PAES-COOH, PAES-2COOH, PAES-g-PEG, and PAES-g-2PEG.

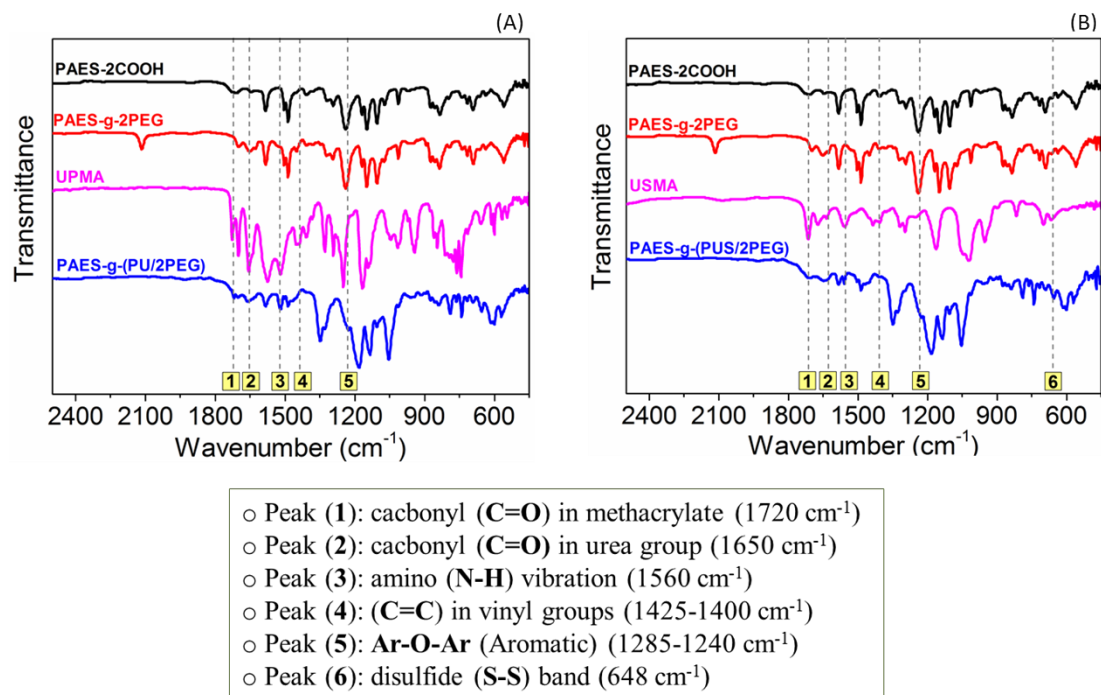

**Figure S5.** FTIR spectra of (A) PAES-2COOH, PAES-g-2PEG, UPMA, PAES-g-(PU/2PEG); and (B) PAES-2COOH, PAES-g-2PEG, USMA, PAES-g-(PUS/2PEG).

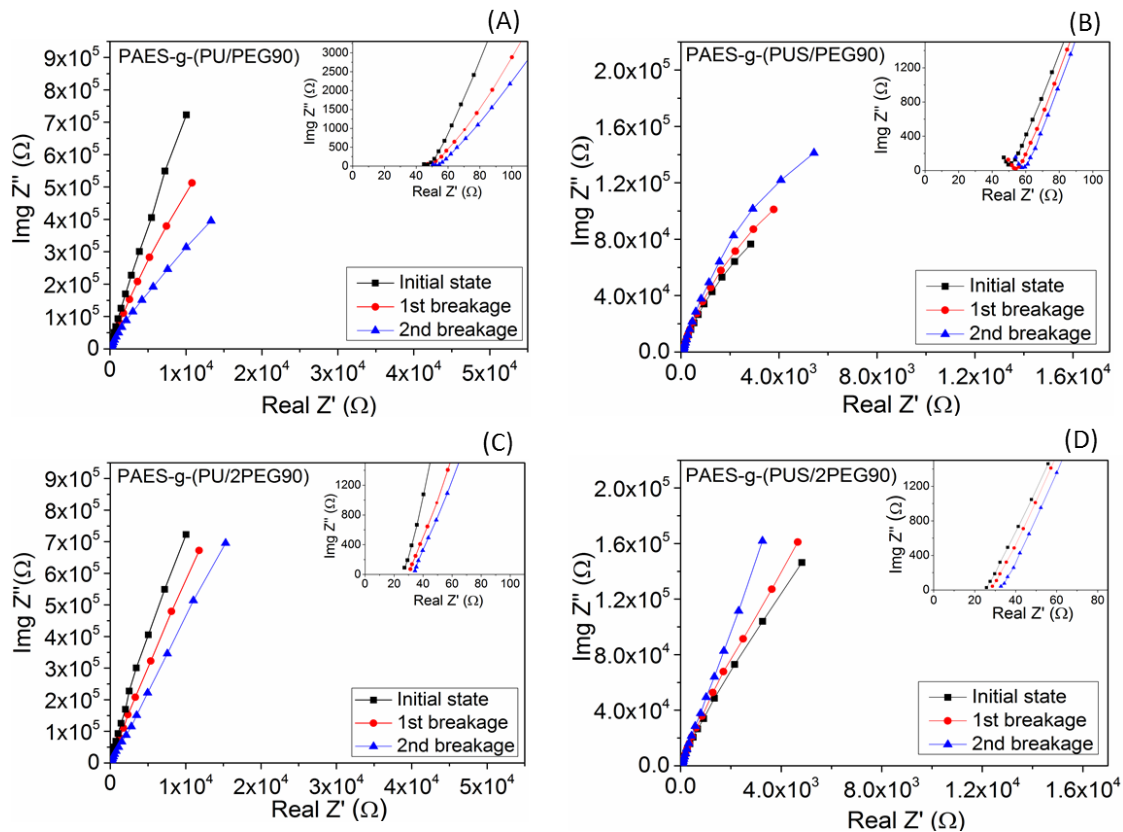

**Figure S6.** Nyquist plots before and after healing of (A) PAES-g-(PU/PEG90); (B) PAES-g-(PUS/PEG90); (A) PAES-g-(PU/2PEG90); and (A) PAES-g-(PUS/2PEG90) solid electrolytes containing 60 wt.% of (IL-EC) mixture.



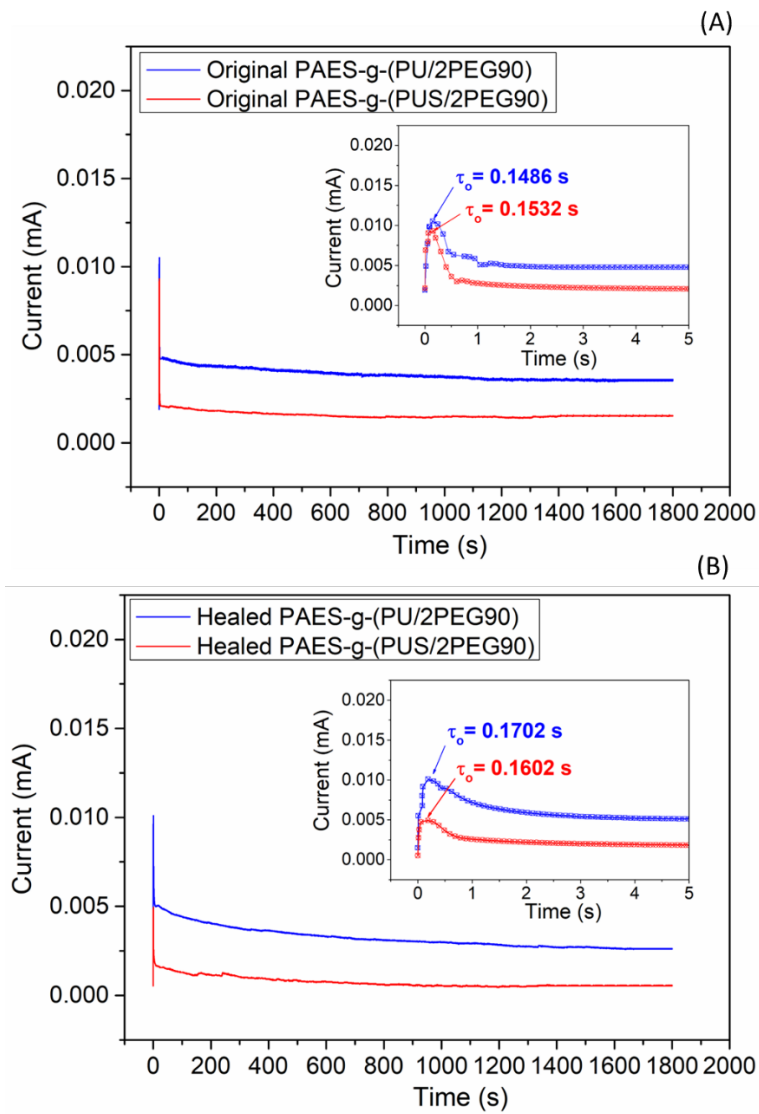

**Figure S7.** Transient ion current (TIC) curves of PAES-g-(PU/2PEG90) and PAES-g-(PUS/2PEG90) solid electrolytes (A) at original state and (B) after 2<sup>nd</sup> healing.

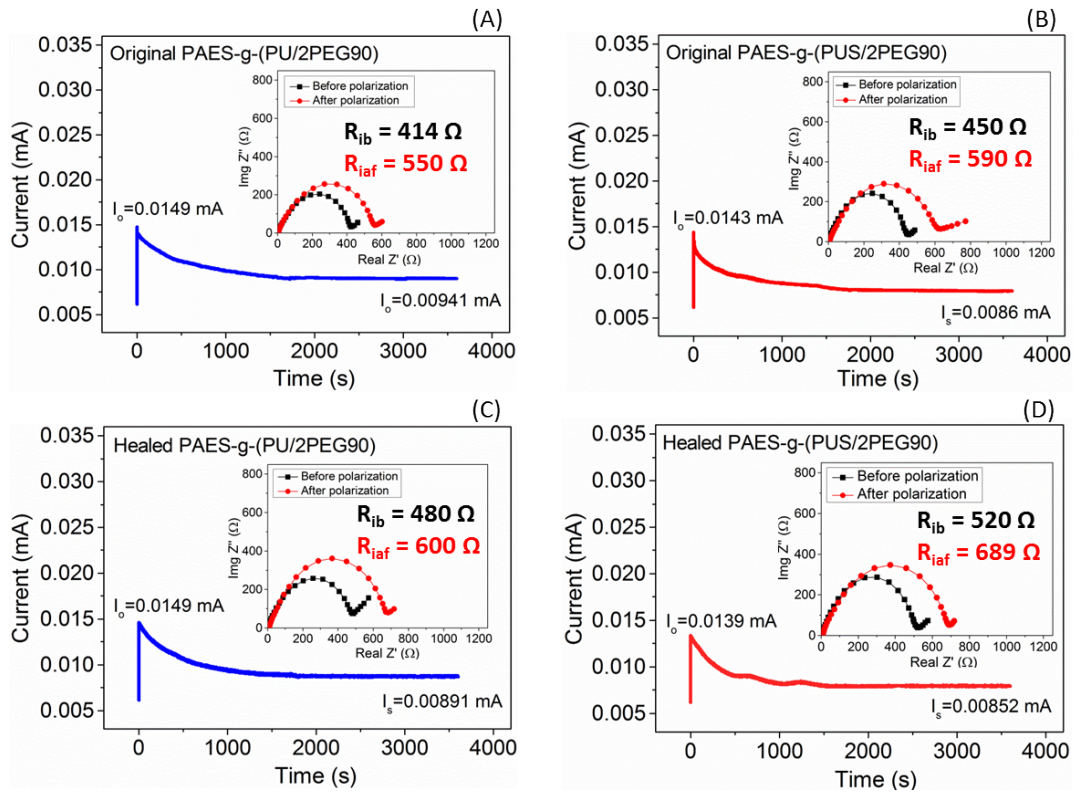

**Figure S8.** Current-time plots and impedance spectra before and after polarization of (A) original PAES-g-(PU/2PEG90); (B) original PAES-g-(PUS/2PEG90); (C) healed PAES-g-(PU/2PEG90); and (D) healed PAES-g-(PUS/2PEG90).

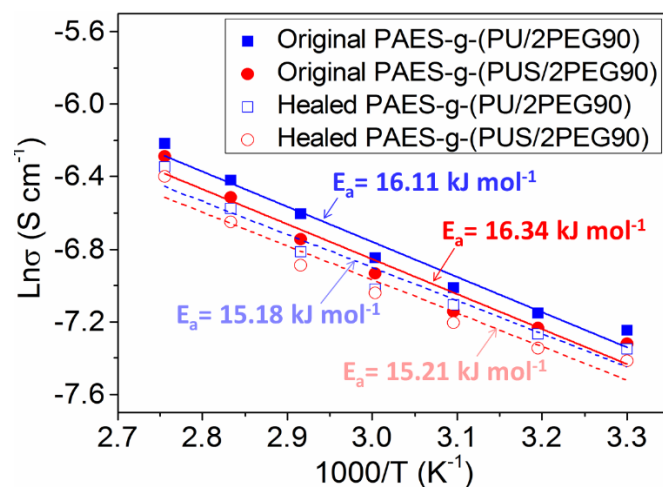

**Figure S9.** Thermal activation energy of PAES-g-(PU/2PEG) and PAES-g-(PUS/2PEG) electrolyte membranes before and after healing.

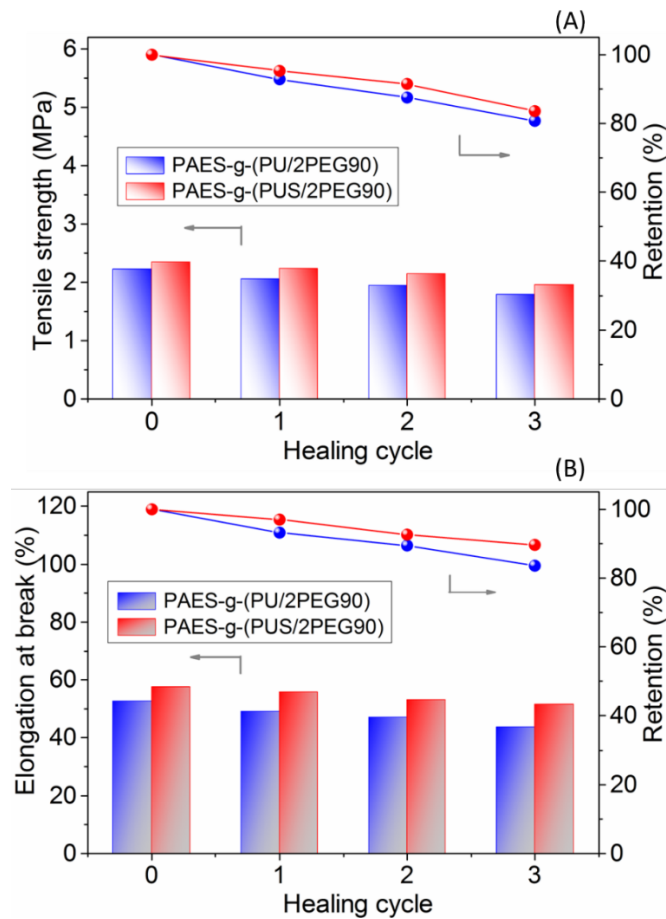

**Figure S10.** Tensile strength and elongation at break of PAES-g-(PU/2PEG) and PAES-g-(PUS/2PEG) electrolyte membranes before and after healing.

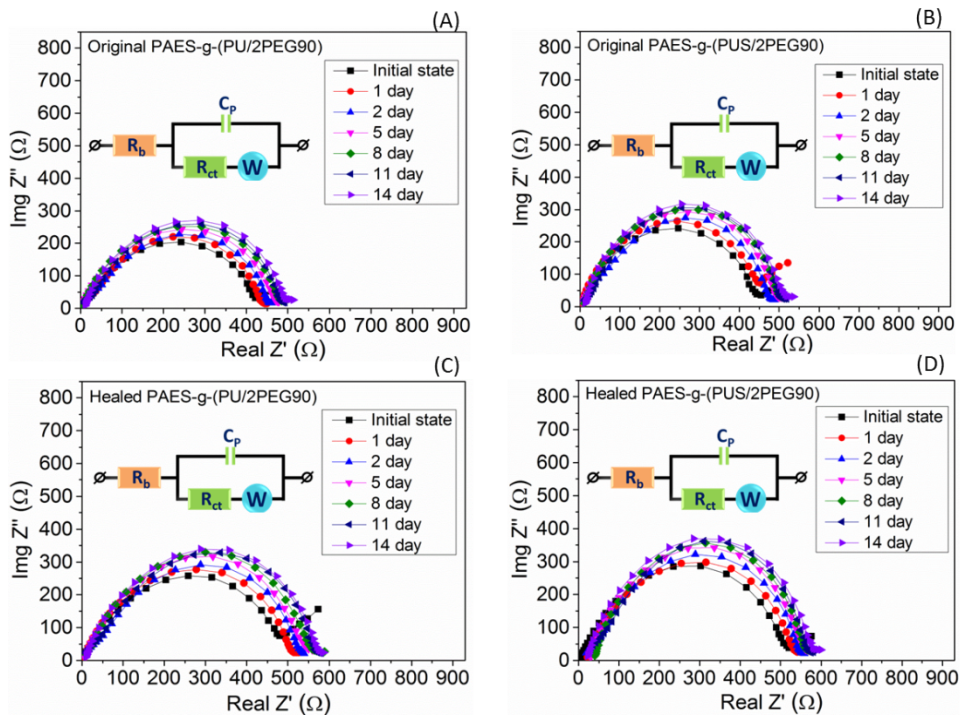

**Figure S11.** EIS plots of Li/PSE/Li cell assembled with PAES-g-(PU/2PEG) and PAES-g-(PUS/2PEG) electrolyte membranes before and after healing at different storage times.

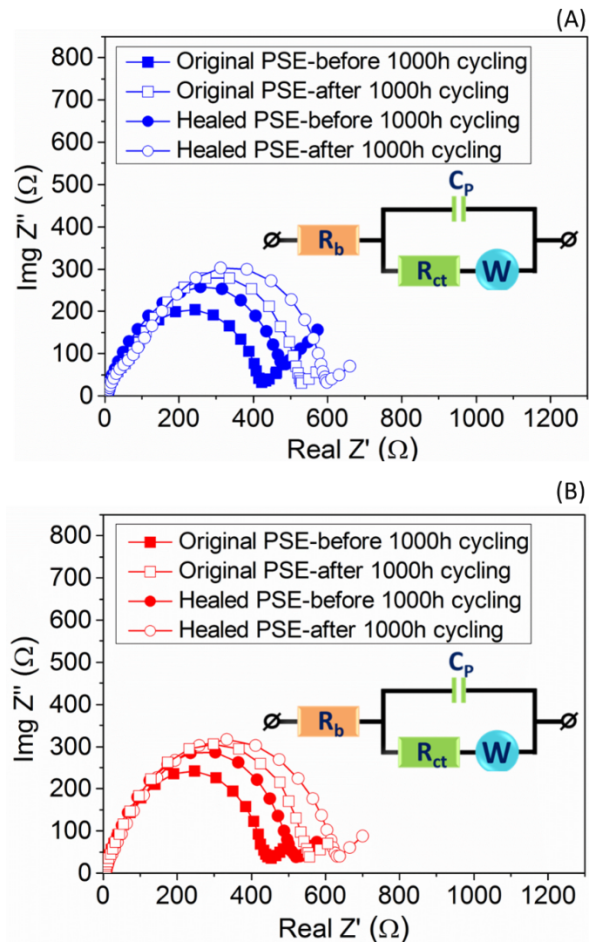

**Figure S12.** EIS plots before and after 1000 h cycling at  $2.0 \text{ mA cm}^{-1}$  for Li/PSE/Li cell assembled with (A) PAES-g-(PU/2PEG) and (B) PAES-g-(PUS/2PEG) electrolyte membranes before and after healing.

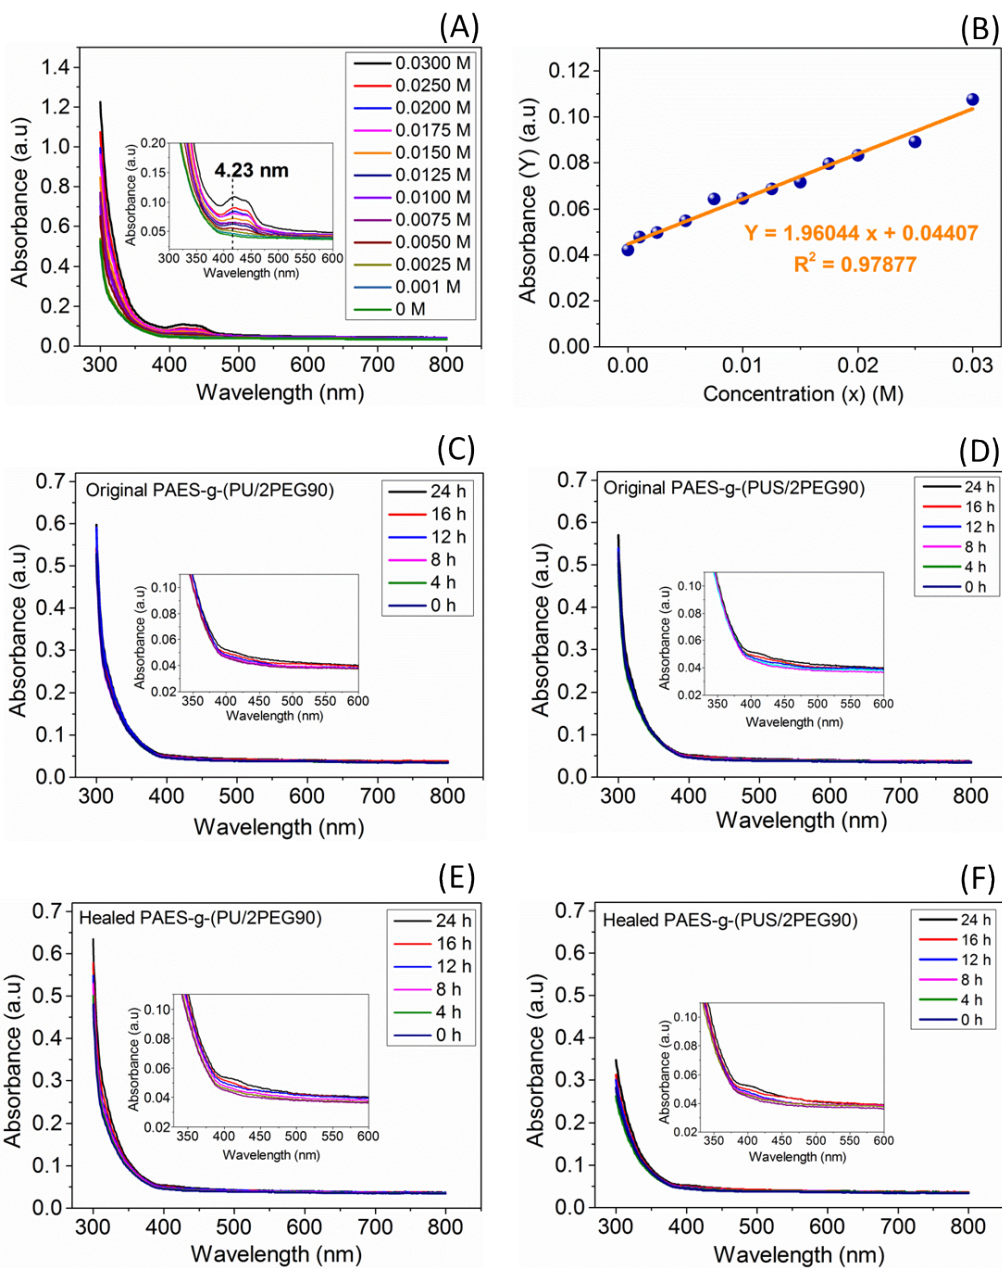

**Figure S13.** (A) UV-vis spectra of PS solution at different concentrations; (B) calibration plot of absorbance vs. PS concentration with the linear regression; (C-F) UV-vis spectra of PS solution diffused through PAES-g-(PU/2PEG) and PAES-g-(PUS/2PEG) electrolyte membranes before and after healing.

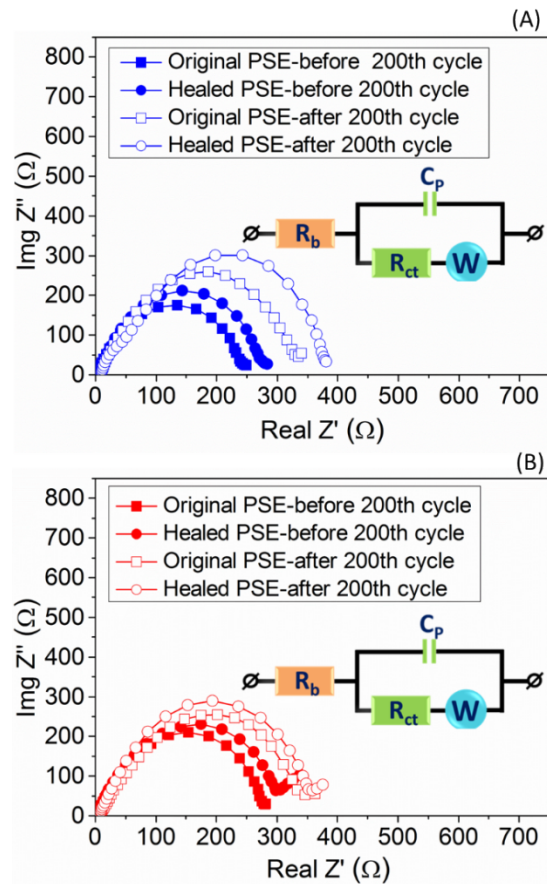

**Figure S14.** Interfacial resistance before and after 200 cycles of S/PSE/Li cells assembled with (A) PAES-g-(PU/2PEG); and (B) PAES-g-(PUS/2PEG) electrolyte membranes before and after healing.



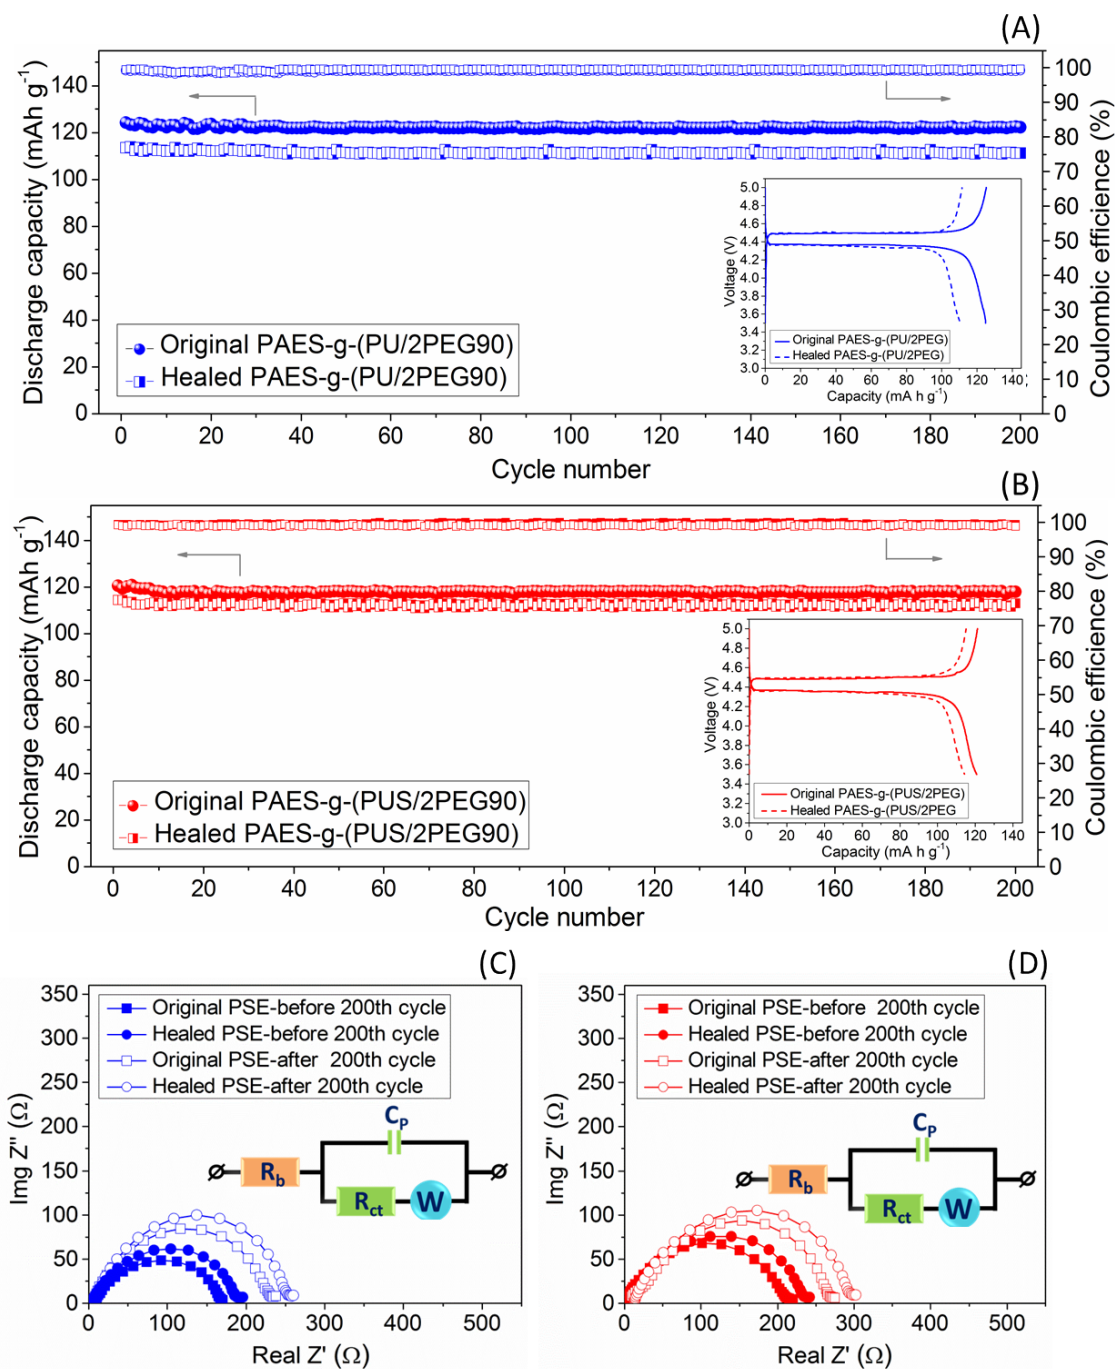

**Figure S15.** (A-B) Lithium storage performance at 0.2 C of LNMO/PSE/Li cells containing PAES-g-(PU/2PEG) and PAES-g-(PUS/2PEG) electrolyte membranes before and after healing; (C-D) Interfacial resistance of LNMO/PSE/Li cells before and after 200 cycles in voltage range of 3.5 -5.0 V.

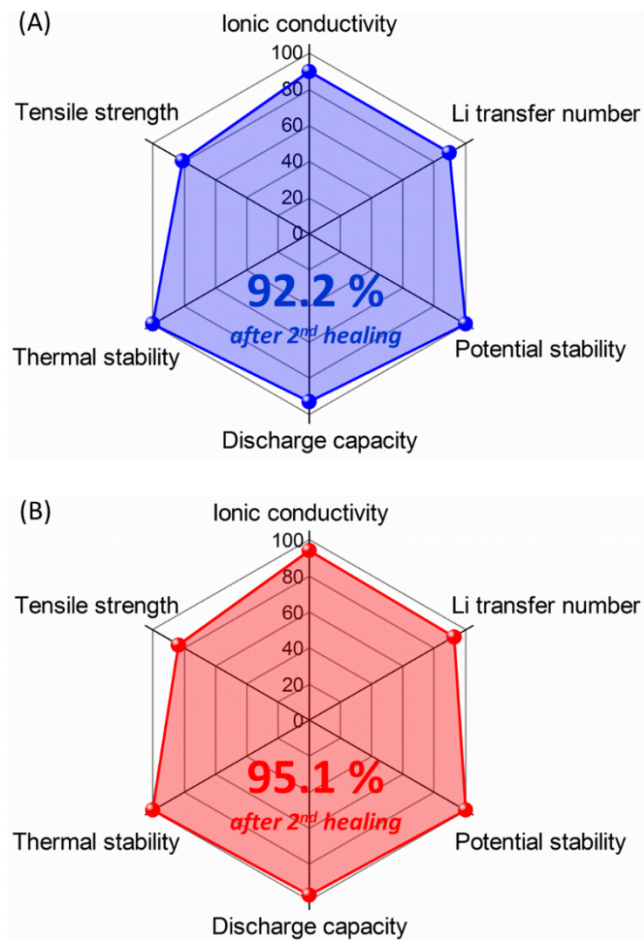

**Figure S16.** Radar diagram for important aspects related to self-healing efficiency of (A) healed PAES-g-(PU/2PEG); and (B) healed PAES-g-(PUS/2PEG) electrolyte membranes after 2<sup>nd</sup> damage.

**Table S1.** Comparison of ionic conductivity ( $\sigma$ ), tensile strength and electrochemical stability window of 2<sup>nd</sup>-healed PAES-g-(SHP/2PEG) membranes with those of other electrolytes recently reported.<sup>1-16</sup>

| Electrolyte membranes                                   | $\sigma$<br>(mS cm <sup>-1</sup> ) | TS <sup>a)</sup><br>(MPa) | ESW <sup>b)</sup><br>(V) | [Ref]           |
|---------------------------------------------------------|------------------------------------|---------------------------|--------------------------|-----------------|
| Poly(PEG-co-BTA)/zwitterion                             | 4.79                               | 0.05                      | 4.5                      | [1]             |
| PIL-UPy/ LiTFSI (DOL+DME)                               | 1.57                               | 0.047                     | 5.3                      | [2]             |
| Poly(PEO-co-TFB)/ LiTFSI                                | 0.784                              | 0.137                     | 5.0                      | [3]             |
| <b>Healed PAES-g-(PU/2PEG90)</b>                        | <b>0.641</b>                       | <b>1.98</b>               | <b>5.4</b>               | <b>Our work</b> |
| <b>Healed PAES-g-(PUS/2PEG90)</b>                       | <b>0.659</b>                       | <b>2.14</b>               | <b>5.6</b>               | <b>Our work</b> |
| Poly(MPC-co-SBVI)                                       | 0.60                               | 0.116                     | 5.4                      | [4]             |
| DPIL-6/ LiTFSI                                          | 0.347                              | 0.490                     | 4.9                      | [5]             |
| PVA-UPy-PEG <i>co-grafting</i>                          | 0.287                              | 0.13                      | 5.2                      | [6]             |
| Sulfide SS-PMSS/ SiO <sub>2</sub> <i>composite</i>      | 0.279                              | 0.15                      | 4.82                     | [7]             |
| <i>Cross-linking</i> PBA-co-PMMA/LiTFSI                 | 0.169                              | 15.0                      | 4.8                      | [8]             |
| PEG-g-UPyMA/ LiPS                                       | 0.145                              | 0.50                      | 4.6                      | [9]             |
| PVT/EMIMTFSI (IL)                                       | 0.126                              | 0.04                      | 4.5                      | [10]            |
| Poly(UPy-BCDMA)                                         | 0.0293                             | 0.13                      | 5.2                      | [11]            |
| PEG-UPy/ UPy-modified SiO <sub>2</sub> <i>composite</i> | 0.0088                             | 0.51                      | 5.1                      | [12]            |
| Poly(HFBM-co-SBMA)/IL                                   | 0.0063                             | 0.08                      | 4.7                      | [13]            |
| PEGDA-UPyMA/ HCP                                        | 0.0056                             | 0.40                      | 4.85                     | [14]            |
| PEG-UPy/ LiTFSI                                         | 0.0021                             | 0.274                     | 4.8                      | [15]            |
| PEG/BPIL                                                | 0.0011                             | 2.50                      | 5.0                      | [16]            |

<sup>a)</sup> Tensile strength and <sup>b)</sup> electrochemical stability window.

**Table S2.** Comparison of the S/SPE/Li cell performance based on PAES-g-(SHP/2PEG) membranes with those based on some other electrolytes recently reported.<sup>17-29</sup>

| Electrolyte membranes                                                                                           | Discharge capacity (mAh g <sup>-1</sup> ) |              |              |              |              | [Ref]           |
|-----------------------------------------------------------------------------------------------------------------|-------------------------------------------|--------------|--------------|--------------|--------------|-----------------|
|                                                                                                                 | 0.2C                                      | 0.5C         | 1.0C         | 2.0C         | 5.0C         |                 |
| PEO/ PIM-8% <i>gel electrolyte</i>                                                                              | 1200                                      | 1100         | 910          | 600          |              | [17]            |
| SO <sub>3</sub> Li <i>grafted</i> UIO (MOF) /LiTFSI +IL                                                         | 985                                       | 890          | 749          | -            | -            | [18]            |
| PEGDA /Li <sub>6.5</sub> La <sub>3</sub> Zr <sub>1.5</sub> Ta <sub>0.5</sub> O <sub>12</sub> <i>composite</i>   | 968                                       | 780          | 600          | 585          | -            | [19]            |
| PEO-Li <sub>4</sub> (BH <sub>4</sub> ) <sub>3</sub> I/ SiO <sub>2</sub> (5%wt) <i>composite</i>                 | 950                                       | 817          | 613          | 583          | -            | [20]            |
| <b>Healed PAES-g-(PUS/2PEG90)</b>                                                                               | <b>929.8</b>                              | <b>891.6</b> | <b>837.9</b> | <b>776.6</b> | <b>683.3</b> | <b>Our work</b> |
| <b>Healed PAES-g-(PU/2PEG90)</b>                                                                                | <b>919.9</b>                              | <b>885</b>   | <b>832.5</b> | <b>769.2</b> | <b>674.1</b> | <b>Our work</b> |
| PETT-DA/ (PEO + PVDF-HFP) <i>nano-fiber</i>                                                                     | 910                                       | 766          | 624          | 543          | -            | [21]            |
| <i>In-situ</i> S-DCBQ organosulfur                                                                              | 890                                       | 795          | 750          | 600          | -            | [22]            |
| PEO/(LLZO+MWCNT) <i>composite</i>                                                                               | 873                                       | 810          | 500          | 400          | -            | [23]            |
| PETEA+divinyladipate/(DOL+TEGDME)                                                                               | 779                                       | 621          | 325          | 220          | -            | [24]            |
| PEO/ (P <sub>2</sub> S <sub>5</sub> + LiTFSI) <i>gel electrolyte</i>                                            | 750                                       | 450          | -            | -            | -            | [25]            |
| PEO/ Li <sub>1.3</sub> Al <sub>0.3</sub> Ti <sub>1.7</sub> (PO <sub>4</sub> ) <sub>3</sub> / PEO ( <i>LbL</i> ) | 692.9                                     | 428.4        | 362.3        | -            | -            | [26]            |
| Polydopamine-coated Li <sub>6</sub> PS <sub>5</sub> Cl <i>solid</i>                                             | 552.8                                     | 226.4        | -            | -            | -            | [27]            |
| PEO/TCM+ LiTFSI) <i>solid electrolyte</i>                                                                       | 450                                       | 300          | -            | -            | -            | [28]            |
| LiPS/Li <sub>3</sub> HoBr <sub>6</sub> <i>composite electrolyte</i>                                             | 450                                       | 250          | 140          | -            | -            | [29]            |

## Reference

- 1 K. Deng, S. Zhou, Z. Xu, M. Xiao and Y. Meng, *Chemical Engineering Journal*, 2022, **428**, 131224.
- 2 P. Guo, A. Su, Y. Wei, X. Liu, Y. Li, F. Guo, J. Li, Z. Hu and J. Sun, *ACS Appl. Mater. Interfaces*, 2019, **11**, 19413–19420.
- 3 L. Zhang, P. Zhang, C. Chang, W. Guo, Z. H. Guo and X. Pu, *ACS Appl. Mater. Interfaces*, 2021, **13**, 46794–46802.
- 4 A. J. D'Angelo and M. J. Panzer, *Chem. Mater.*, 2019, **31**, 2913–2922.
- 5 R. Li, Z. Fang, C. Wang, X. Zhu, X. Fu, J. Fu, W. Yan and Y. Yang, *Chemical Engineering Journal*, 2022, **430**, 132706.
- 6 Y. H. Jo, B. Zhou, K. Jiang, S. Li, C. Zuo, H. Gan, D. He, X. Zhou and Z. Xue, *Polym. Chem.*, 2019, **10**, 6561–6569.
- 7 C. Chang, Y. Yao, R. Li, Z. H. Guo, L. Li, C. Pan, W. Hu and X. Pu, *Nano Energy*, 2022, **93**, 106871.
- 8 B. Zhou, D. He, J. Hu, Y. Ye, H. Peng, X. Zhou, X. Xie and Z. Xue, *J. Mater. Chem. A*, 2018, **6**, 11725–11733.
- 9 H. Gan, Y. Zhang, S. Li, L. Yu, J. Wang and Z. Xue, *ACS Appl. Energy Mater.*, 2021, **4**, 482–491.
- 10 X. Tian, P. Yang, Y. Yi, P. Liu, T. Wang, C. Shu, L. Qu, W. Tang, Y. Zhang, M. Li and B. Yang, *Journal of Power Sources*, 2020, **450**, 227629.
- 11 B. Zhou, C. Zuo, Z. Xiao, X. Zhou, D. He, X. Xie and Z. Xue, *Chemistry – A European Journal*, 2018, **24**, 19200–19207.

- 12B. Zhou, Y. H. Jo, R. Wang, D. He, X. Zhou, X. Xie and Z. Xue, *J. Mater. Chem. A*, 2019, **7**, 10354–10362.
- 13C. Wang, R. Li, P. Chen, Y. Fu, X. Ma, T. Shen, B. Zhou, K. Chen, J. Fu, X. Bao, W. Yan and Y. Yang, *J. Mater. Chem. A*, 2021, **9**, 4758–4769.
- 14B. Zhou, M. Yang, C. Zuo, G. Chen, D. He, X. Zhou, C. Liu, X. Xie and Z. Xue, *ACS Macro Lett.*, 2020, **9**, 525–532.
- 15L. Chen, X. Cai, Z. Sun, B. Zhang, Y. Bao, Z. Liu, D. Han and L. Niu, *Polymers*, , DOI:10.3390/polym13234155.
- 16X. Zhu, Z. Fang, Q. Deng, Y. Zhou, X. Fu, L. Wu, W. Yan and Y. Yang, *ACS Sustainable Chem. Eng.*, 2022, **10**, 4173–4185.
- 17S. Zhou, K. Deng, Z. Xu, M. Xiao and Y. Meng, *Chemical Engineering Journal*, 2022, **442**, 136083.
- 18X. Zhang, T. Zhang, Y. Shao, H. Cao, Z. Liu, S. Wang and X. Zhang, *ACS Sustainable Chem. Eng.*, 2021, **9**, 5396–5404.
- 19Y. Ji, K. Yang, M. Liu, S. Chen, X. Liu, B. Yang, Z. Wang, W. Huang, Z. Song, S. Xue, Y. Fu, L. Yang, T. S. Miller and F. Pan, *Advanced Functional Materials*, 2021, **31**, 2104830.
- 20P. Chiochan, X. Yu, M. Sawangphruk and A. Manthiram, *Advanced Energy Materials*, 2020, **10**, 2001285.
- 21X. Wang, X. Hao, Z. Hengjing, X. Xia and J. Tu, *Electrochimica Acta*, 2020, **329**, 135108.
- 22S. Huang, Y. Wang, J. Hu, Y. Von Lim, D. Kong, L. Guo, Z. Kou, Y. Chen and H. Y. Yang, *NPG Asia Materials*, 2019, **11**, 55.
- 23F. Chen, Y. Zhang, Q. Hu, S. Cao, S. Song, X. Lu and Q. Shen, *Journal of Solid State Chemistry*, 2021, **301**, 122341.

- 24 H. Du, S. Li, H. Qu, B. Lu, X. Wang, J. Chai, H. Zhang, J. Ma, Z. Zhang and G. Cui, *Journal of Membrane Science*, 2018, **550**, 399–406.
- 25 S. Chen, B. Ding, Q. Lin, Y. Shi, B. Hu, Z. Li, H. Dou and X. Zhang, *Journal of Electroanalytical Chemistry*, 2021, **880**, 114874.
- 26 Y. Wang, G. Wang, P. He, J. Hu, J. Jiang and L.-Z. Fan, *Chemical Engineering Journal*, 2020, **393**, 124705.
- 27 G. Liu, J. Shi, M. Zhu, W. Weng, L. Shen, J. Yang and X. Yao, *Energy Storage Materials*, 2021, **38**, 249–254.
- 28 A. Santiago, J. Castillo, I. Garbayo, A. Saenz de Buruaga, J. A. Coca Clemente, L. Qiao, R. Cid Barreno, M. Martinez-Ibañez, M. Armand, H. Zhang and C. Li, *ACS Appl. Energy Mater.*, 2021, **4**, 4459–4464.
- 29 X. Shi, Z. Zeng, M. Sun, B. Huang, H. Zhang, W. Luo, Y. Huang, Y. Du and C. Yan, *Nano Lett.*, 2021, **21**, 9325–9331.
